# Supplementary material
Source: PubMed Central journal article supplement (PMC3982683)
Supplement: 0b9ef25ab9cf6f13b8595fa657d8b91a_genetics.113.160069-4.pdf [file 0b9ef25ab9cf6f13b8595fa657d8b91a_genetics.113.160069-4.pdf]

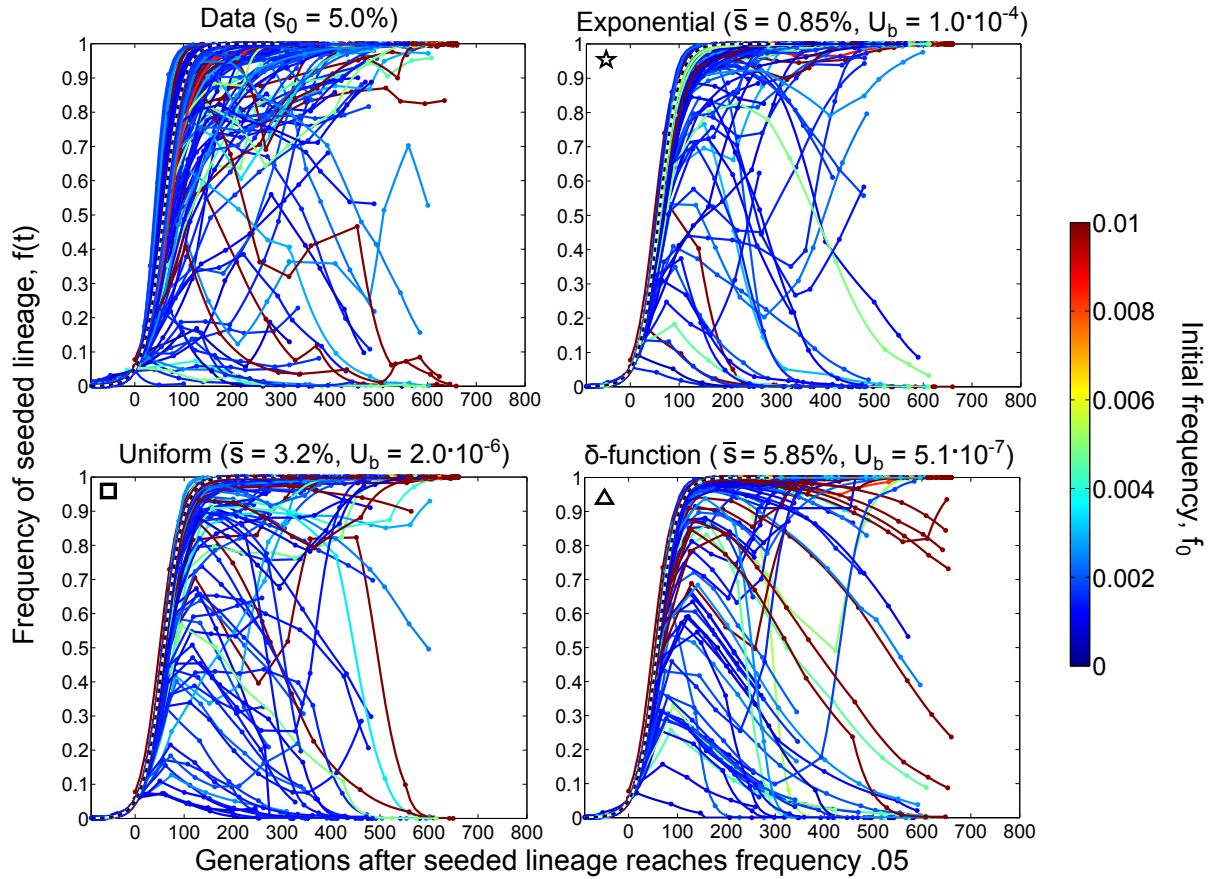

FIG. S2 **Lineage dynamics data and simulations for  $s_0 = 5.0\%$ .** Each panel shows the trajectories of seeded lineages with initial fitness  $s_0 = 5.0\%$  as observed in the experiment (top left) and as reproduced by simulations assuming the DFE parameters indicated above each panel.
