# Supplementary material
Source: PubMed Central journal article supplement (PMC3982683)
Supplement: 4df9be7fec8e7e03c15ca6f5dd099aa2_genetics.113.160069-2.pdf [file 4df9be7fec8e7e03c15ca6f5dd099aa2_genetics.113.160069-2.pdf]

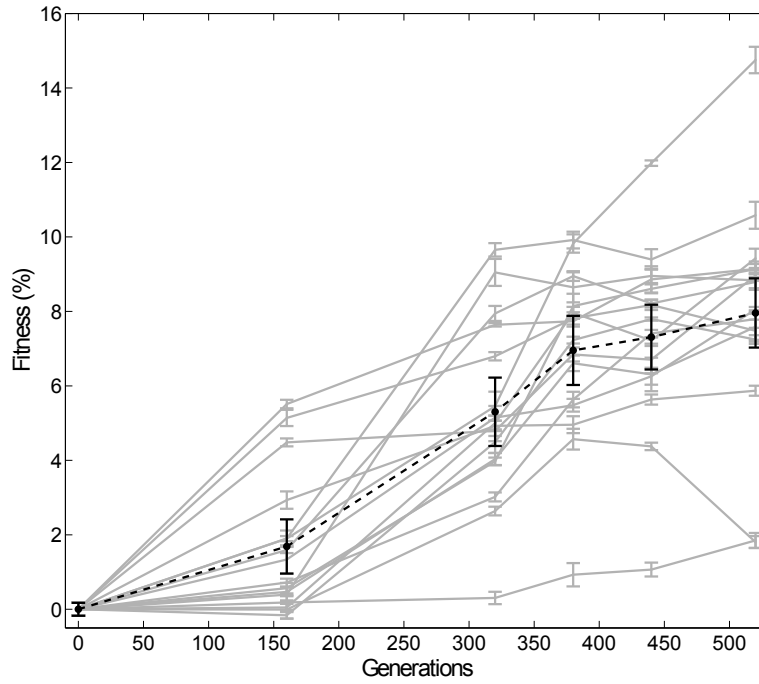

FIG. S4 **The rate of adaptation.** The fitness over time of 16 experimental control populations (grey curves) and their mean (black curve). The error bars are  $\pm 1$  s.e.m.
