# Supplementary material
Source: PubMed Central journal article supplement (PMC3982683)
Supplement: da95024888fc75850577ff5f2524384e_genetics.113.160069-6.pdf [file da95024888fc75850577ff5f2524384e_genetics.113.160069-6.pdf]

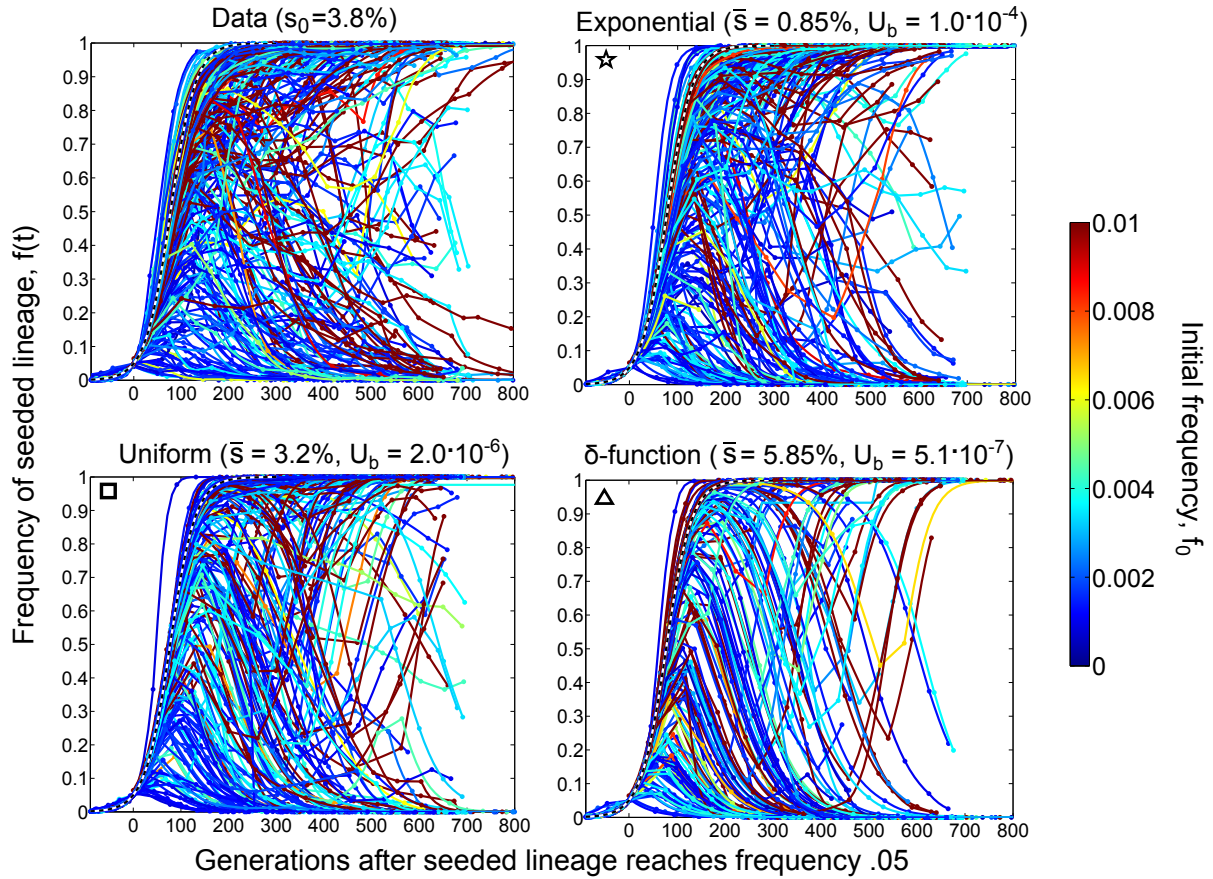

FIG. S1 **Lineage dynamics data and simulations for  $s_0 = 3.8\%$ .** Each panel shows the trajectories of seeded lineages with initial fitness  $s_0 = 3.8\%$  as observed in the experiment (top left) and as reproduced by simulations assuming the DFE parameters indicated above each panel.
